# Supplementary material for: Exploiting Non-Conventional Yeasts for Low-Alcohol Beer Production
Source: MDPI journal article supplement (doi:10.3390/microorganisms11020316), 2023-01-26
Supplement: s1 [file s1]

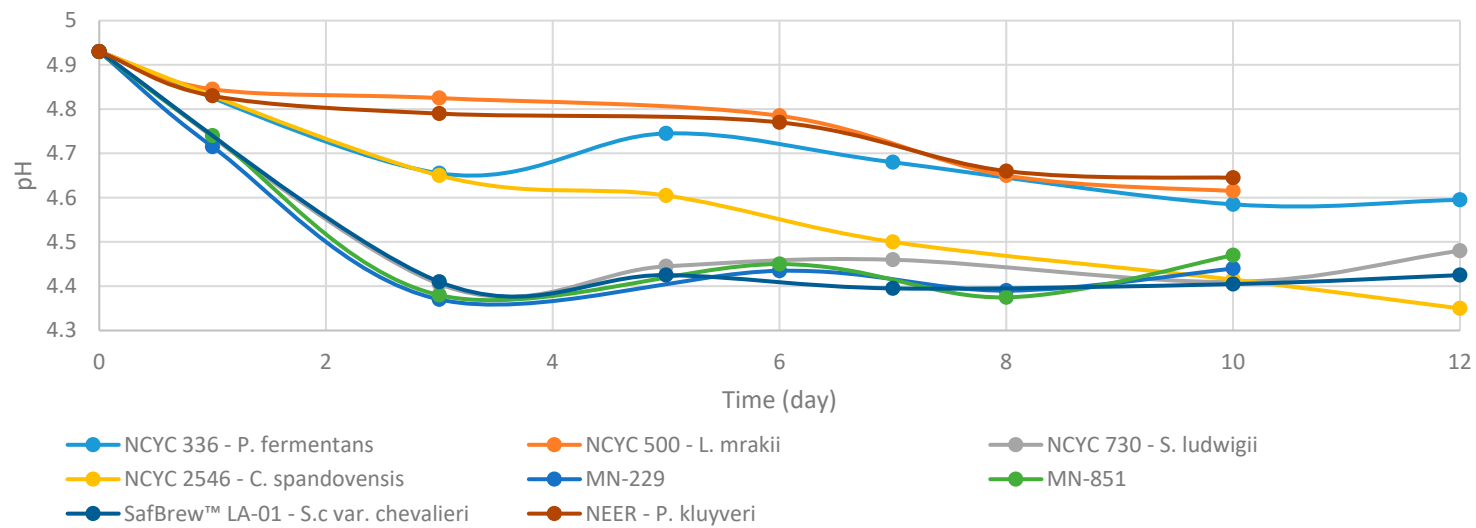

**Figure S1.** pH was measured for 10-12 days, as reported for fermentations of all yeast in this study. Results are reported as the mean of two biological replicates.

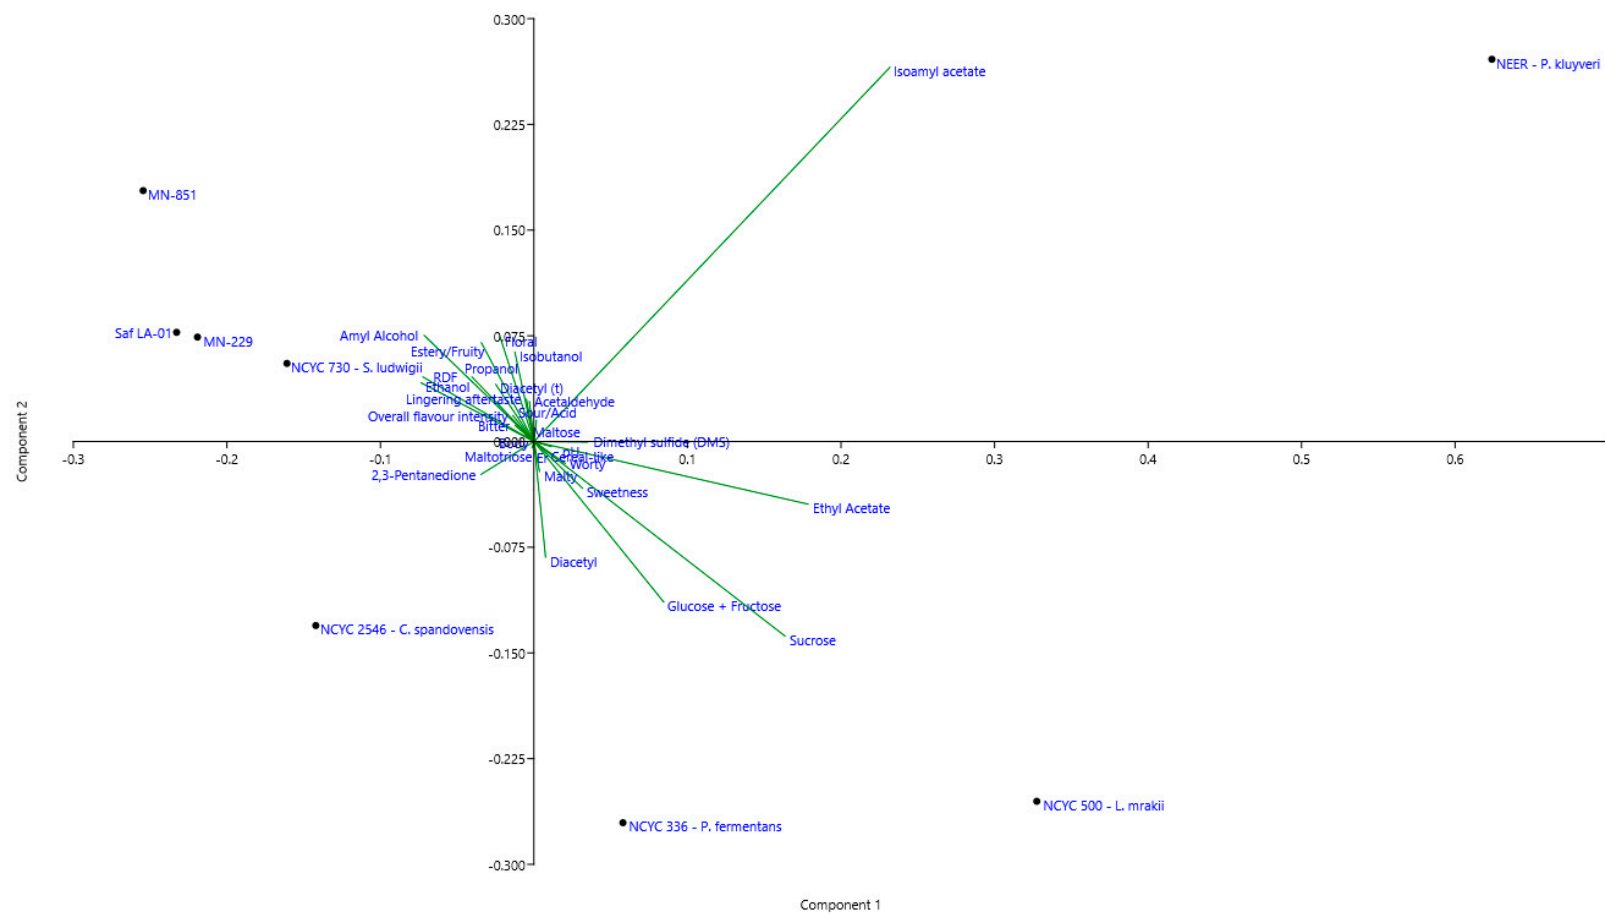

**Figure S2.** Scatter Plot analysis PCA. PC1(52.3%) vs PC2(20.2%).

**Table S1.** Spearman's P-values, highlighted at pink P-values below 0.05.

|                           |                        | Chemical composition |       |          |            |              |               |                 |          |                  |              |                        |                    |         |         |             |         | Sensory analysis          |               |        |       |       |             |              |           |           |        |       |                      |       |  |  |  |  |
|---------------------------|------------------------|----------------------|-------|----------|------------|--------------|---------------|-----------------|----------|------------------|--------------|------------------------|--------------------|---------|---------|-------------|---------|---------------------------|---------------|--------|-------|-------|-------------|--------------|-----------|-----------|--------|-------|----------------------|-------|--|--|--|--|
|                           | Er (%m/m)              | pH                   | RDF   | Propanol | Isobutanol | Amyl Alcohol | Ethyl Acetate | Isoamyl acetate | Diacetyl | 2,3-Pentanedione | Acetaldehyde | Dimethyl sulfide (DMS) | Glucose + Fructose | Sucrose | Maltose | Maltotriose | Ethanol | Overall flavour intensity | Estery/Fruity | Floral | Worty | Malty | Cereal-like | Diacetyl (t) | Sweetness | Sour/Acid | Bitter | Body  | Lingering aftertaste |       |  |  |  |  |
| Sensory analysis          | Er (%m/m)              | 0.083                | 0.000 | 0.058    | 0.428      | 0.007        | 0.752         | 0.428           | 0.037    | 0.216            | 0.501        | 0.389                  | 0.012              | 0.036   | 0.941   | 0.752       | 0.000   | 0.022                     | 0.045         | 0.096  | 0.006 | 0.967 | 0.417       | 0.171        | 0.003     | 0.990     | 0.013  | 0.343 | 0.449                |       |  |  |  |  |
|                           | pH                     | 0.083                | 0.069 | 0.299    | 0.582      | 0.267        | 0.243         | 0.115           | 0.840    | 0.037            | 0.582        | 0.267                  | 0.273              | 0.036   | 0.448   | 0.882       | 0.069   | 0.037                     | 0.045         | 0.299  | 0.019 | 0.587 | 0.182       | 0.160        | 0.042     | 0.471     | 0.161  | 0.055 | 0.227                |       |  |  |  |  |
|                           | RDF                    | 0.000                | 0.069 | 0.083    | 0.083      | 0.462        | 0.005         | 0.703           | 0.462    | 0.058            | 0.267        | 0.752                  | 0.267              | 0.019   | 0.036   | 0.829       | 0.977   | 0.000                     | 0.011         | 0.023  | 0.083 | 0.002 | 0.988       | 0.363        | 0.120     | 0.009     | 0.990  | 0.032 | 0.384                | 0.410 |  |  |  |  |
|                           | Propanol               | 0.058                | 0.299 | 0.083    |            | 0.360        | 0.197         | 0.582           | 0.151    | 0.327            | 0.197        | 0.619                  | 0.793              | 0.085   | 0.560   | 0.507       | 0.619   | 0.083                     | 0.115         | 0.232  | 0.299 | 0.063 | 0.895       | 0.448        | 0.126     | 0.038     | 0.589  | 0.313 | 0.183                | 0.379 |  |  |  |  |
|                           | Isobutanol             | 0.428                | 0.582 | 0.462    | 0.360      |              | 0.171         | 0.935           | 0.665    | 0.216            | 0.327        | 0.462                  | 0.501              | 0.185   | 0.911   | 0.206       | 0.977   | 0.462                     | 0.501         | 0.850  | 0.619 | 0.585 | 0.363       | 0.654        | 0.277     | 0.550     | 0.260  | 0.410 | 0.615                | 0.743 |  |  |  |  |
|                           | Amyl Alcohol           | 0.007                | 0.267 | 0.005    | 0.197      | 0.171        |               | 0.536           | 0.619    | 0.046            | 0.840        | 0.793                  | 0.115              | 0.060   | 0.089   | 0.487       | 0.619   | 0.005                     | 0.083         | 0.184  | 0.267 | 0.041 | 0.940       | 0.389        | 0.079     | 0.084     | 0.381  | 0.041 | 1.000                | 1.000 |  |  |  |  |
|                           | Ethyl Acetate          | 0.752                | 0.243 | 0.703    | 0.582      | 0.935        | 0.536         |                 | 0.022    | 0.360            | 0.882        | 0.083                  | 0.028              | 0.849   | 0.875   | 0.299       | 0.058   | 0.703                     | 0.752         | 0.891  | 0.536 | 0.504 | 0.692       | 0.736        | 0.404     | 0.736     | 0.808  | 0.794 | 0.692                | 0.794 |  |  |  |  |
|                           | Isoamyl acetate        | 0.428                | 0.115 | 0.462    | 0.151      | 0.665        | 0.619         | 0.022           |          | 0.536            | 0.197        | 0.327                  | 0.299              | 0.964   | 0.827   | 0.067       | 0.360   | 0.462                     | 0.582         | 0.850  | 0.752 | 0.313 | 0.924       | 0.871        | 0.990     | 0.363     | 0.646  | 0.743 | 0.255                | 0.887 |  |  |  |  |
|                           | Diacetyl               | 0.037                | 0.840 | 0.058    | 0.327      | 0.216        | 0.046         | 0.360           | 0.536    |                  | 0.935        | 0.115                  | 0.977              | 0.022   | 0.167   | 0.396       | 0.360   | 0.058                     | 0.267         | 0.245  | 0.096 | 0.244 | 0.716       | 0.541        | 0.439     | 0.117     | 0.781  | 0.041 | 0.971                | 0.743 |  |  |  |  |
|                           | 2,3-Pentanedione       | 0.216                | 0.037 | 0.267    | 0.197      | 0.327        | 0.840         | 0.882           | 0.197    | 0.935            |              | 0.665                  | 0.665              | 0.468   | 0.208   | 0.364       | 0.360   | 0.267                     | 0.151         | 0.141  | 0.501 | 0.141 | 0.716       | 0.895        | 0.943     | 0.100     | 0.275  | 0.483 | 0.025                | 0.255 |  |  |  |  |
|                           | Acetaldehyde           | 0.501                | 0.582 | 0.752    | 0.619      | 0.462        | 0.793         | 0.083           | 0.327    | 0.115            | 0.665        |                        | 0.096              | 0.363   | 0.702   | 0.364       | 0.037   | 0.752                     | 0.882         | 0.891  | 0.703 | 0.942 | 0.801       | 0.587        | 0.729     | 0.550     | 0.735  | 0.449 | 0.971                | 0.830 |  |  |  |  |
|                           | Dimethyl sulfide (DMS) | 0.389                | 0.267 | 0.267    | 0.793      | 0.501        | 0.115         | 0.028           | 0.299    | 0.977            | 0.665        | 0.096                  |                    | 0.629   | 0.399   | 0.989       | 0.037   | 0.267                     | 0.389         | 0.603  | 0.840 | 0.244 | 0.852       | 0.233        | 0.062     | 0.566     | 0.507  | 0.379 | 0.971                | 0.928 |  |  |  |  |
|                           | Glucose + Fructose     | 0.012                | 0.273 | 0.019    | 0.085      | 0.185        | 0.060         | 0.849           | 0.964    | 0.022            | 0.468        | 0.363                  | 0.629              |         | 0.074   | 0.841       | 0.285   | 0.019                     | 0.030         | 0.030  | 0.008 | 0.031 | 0.570       | 0.459        | 0.160     | 0.004     | 0.579  | 0.016 | 0.238                | 0.141 |  |  |  |  |
|                           | Sucrose                | 0.036                | 0.036 | 0.036    | 0.560      | 0.911        | 0.089         | 0.875           | 0.827    | 0.167            | 0.102        | 0.703                  | 0.399              | 0.074   |         | 0.762       | 0.702   | 0.036                     | 0.036         | 0.036  | 0.113 | 0.048 | 0.494       | 0.048        | 0.442     | 0.036     | 0.905  | 0.027 | 0.286                | 0.348 |  |  |  |  |
|                           | Maltose                | 0.941                | 0.448 | 0.829    | 0.507      | 0.206        | 0.487         | 0.299           | 0.967    | 0.396            | 0.364        | 0.364                  | 0.989              | 0.841   | 0.762   |             | 0.989   | 0.829                     | 0.711         | 0.850  | 1.000 | 0.982 | 0.540       | 0.965        | 0.320     | 0.675     | 0.049  | 0.989 | 0.183                | 0.343 |  |  |  |  |
|                           | Maltotriose            | 0.752                | 0.882 | 0.977    | 0.619      | 0.977        | 0.619         | 0.058           | 0.360    | 0.360            | 0.360        | 0.037                  | 0.037              | 0.285   | 0.702   | 0.989       |         | 0.977                     | 0.703         | 0.464  | 0.243 | 0.942 | 0.564       | 0.756        | 0.623     | 0.379     | 0.233  | 0.617 | 0.290                | 0.227 |  |  |  |  |
| Ethanol                   | 0.000                  | 0.069                | 0.000 | 0.083    | 0.462      | 0.005        | 0.703         | 0.462           | 0.058    | 0.267            | 0.752        | 0.267                  | 0.019              | 0.036   | 0.829   | 0.977       |         | 0.011                     | 0.023         | 0.083  | 0.002 | 0.988 | 0.363       | 0.120        | 0.009     | 0.990     | 0.032  | 0.384 | 0.410                |       |  |  |  |  |
| Overall flavour intensity | 0.022                  | 0.037                | 0.011 | 0.115    | 0.501      | 0.083        | 0.752         | 0.582           | 0.267    | 0.151            | 0.882        | 0.389                  | 0.030              | 0.036   | 0.711   | 0.703       | 0.011   |                           | 0.001         | 0.058  | 0.001 | 0.329 | 0.448       | 0.054        | 0.011     | 0.761     | 0.122  | 0.123 | 0.161                |       |  |  |  |  |
| Estery/Fruity             | 0.045                  | 0.045                | 0.023 | 0.232    | 0.850      | 0.184        | 0.891         | 0.850           | 0.245    | 0.141            | 0.891        | 0.603                  | 0.030              | 0.036   | 0.850   | 0.464       | 0.023   | 0.030                     | 0.001         |        | 0.010 | 0.004 | 0.530       | 0.283        | 0.114     | 0.017     | 0.390  | 0.139 | 0.084                | 0.042 |  |  |  |  |
| Floral                    | 0.096                  | 0.299                | 0.083 | 0.299    | 0.619      | 0.267        | 0.536         | 0.752           | 0.096    | 0.501            | 0.703        | 0.840                  | 0.008              | 0.113   | 1.000   | 0.243       | 0.083   | 0.058                     | 0.010         |        | 0.063 | 0.801 | 0.298       | 0.277        | 0.033     | 0.197     | 0.104  | 0.183 | 0.017                |       |  |  |  |  |
| Worty                     | 0.006                  | 0.019                | 0.002 | 0.063    | 0.585      | 0.041        | 0.504         | 0.313           | 0.244    | 0.141            | 0.942        | 0.244                  | 0.031              | 0.048   | 0.982   | 0.942       | 0.002   | 0.001                     | 0.004         | 0.063  |       | 0.615 | 0.409       | 0.088        | 0.006     | 0.680     | 0.091  | 0.125 | 0.166                |       |  |  |  |  |
| Malty                     | 0.967                  | 0.587                | 0.988 | 0.895    | 0.363      | 0.940        | 0.692         | 0.924           | 0.716    | 0.716            | 0.801        | 0.852                  | 0.570              | 0.494   | 0.540   | 0.564       | 0.988   | 0.329                     | 0.530         | 0.801  | 0.615 |       | 0.859       | 0.149        | 0.551     | 0.928     | 0.683  | 0.324 | 0.648                |       |  |  |  |  |
| Cereal-like               | 0.417                  | 0.182                | 0.363 | 0.448    | 0.654      | 0.389        | 0.736         | 0.871           | 0.541    | 0.895            | 0.587        | 0.233                  | 0.459              | 0.048   | 0.965   | 0.756       | 0.363   | 0.448                     | 0.283         | 0.298  | 0.409 | 0.859 |             | 0.090        | 0.415     | 0.819     | 0.112  | 0.727 | 0.515                |       |  |  |  |  |
| Diacetyl (t)              | 0.171                  | 0.160                | 0.120 | 0.826    | 0.277      | 0.079        | 0.404         | 0.990           | 0.439    | 0.943            | 0.729        | 0.062                  | 0.160              | 0.042   | 0.320   | 0.623       | 0.120   | 0.054                     | 0.114         | 0.277  | 0.088 | 0.149 | 0.090       |              | 0.197     | 0.532     | 0.104  | 0.665 | 0.656                |       |  |  |  |  |
| Sweetness                 | 0.003                  | 0.042                | 0.009 | 0.038    | 0.550      | 0.084        | 0.736         | 0.363           | 0.117    | 0.100            | 0.550        | 0.566                  | 0.004              | 0.036   | 0.675   | 0.379       | 0.009   | 0.011                     | 0.017         | 0.033  | 0.006 | 0.551 | 0.415       | 0.197        |           | 0.399     | 0.016  | 0.058 | 0.115                |       |  |  |  |  |
| Sour/Acid                 | 0.990                  | 0.471                | 0.990 | 0.589    | 0.260      | 0.381        | 0.808         | 0.646           | 0.781    | 0.275            | 0.735        | 0.507                  | 0.579              | 0.905   | 0.049   | 0.233       | 0.990   | 0.761                     | 0.390         | 0.197  | 0.680 | 0.928 | 0.819       | 0.532        | 0.399     |           | 0.922  | 0.040 | 0.10                 |       |  |  |  |  |
| Bitter                    | 0.013                  | 0.161                | 0.032 | 0.313    | 0.410      | 0.041        | 0.794         | 0.743           | 0.041    | 0.483            | 0.449        | 0.379                  | 0.016              | 0.027   | 0.989   | 0.617       | 0.032   | 0.122                     | 0.139         | 0.104  | 0.091 | 0.683 | 0.112       | 0.104        | 0.016     | 0.922     |        | 0.423 | 0.483                |       |  |  |  |  |
| Body                      | 0.343                  | 0.055                | 0.384 | 0.183    | 0.615      | 1.000        | 0.692         | 0.255           | 0.971    | 0.025            | 0.971        | 0.971                  | 0.238              | 0.286   | 0.183   | 0.290       | 0.384   | 0.123                     | 0.084         | 0.183  | 0.125 | 0.324 | 0.727       | 0.665        | 0.058     | 0.040     | 0.423  |       | 0.021                |       |  |  |  |  |
| Lingering aftertaste      | 0.449                  | 0.227                | 0.410 | 0.379    | 0.743      | 1.000        | 0.794         | 0.887           | 0.743    | 0.255            | 0.830        | 0.928                  | 0.141              | 0.348   | 0.343   | 0.227       | 0.410   | 0.161                     | 0.042         | 0.017  | 0.166 | 0.648 | 0.515       | 0.656        | 0.115     | 0.010     | 0.483  | 0.021 |                      |       |  |  |  |  |
